# Supplementary material for: Reformulation of Top-Selling Processed and Ultra-Processed Foods and Beverages in the Peruvian Food Supply after Front-of-Package Warning Label Policy
Source: MDPI journal article supplement (doi:10.3390/ijerph20010424), 2022-12-27
Supplement: s1 [file s1]

**Table S1.** Foods and beverages categories included in the study

| Group     | Study categories                         | Descriptions/Examples                                                                                                                          |
|-----------|------------------------------------------|------------------------------------------------------------------------------------------------------------------------------------------------|
| Foods     | Bread and Bakery Products                | Pre-packaged foods made primarily of wheat flour with added additives / Cookies, muffins                                                       |
|           | Cereals                                  | Flavored wheat flakes and bars / Breakfast cereal, cereal bar                                                                                  |
|           | Candies and Desserts                     | Sweets, chocolates powered desserts that are not grain based/ Candies, chocolates, jelly                                                       |
|           | Ice creams                               | Desserts based on milk / Milk based ice cream, ice cream-based desserts                                                                        |
|           | Prepared, Ready to Eat Meals             | Ready-to-eat preparations / Instant soups, creamy vegetable soup                                                                               |
|           | Meat and Eggs                            | Processed meat with added additives / Ham, hot dog                                                                                             |
|           | Dairy Based products                     | Processed food based on milk / Cream cheese, yogurt                                                                                            |
|           | Sauces, Spreads and Oils                 | Sauces that accompany the preparations, salad dressings and margarine / Ketchup, mustard, chili sauces, salad dressings, mayonnaise, margarine |
|           | Snacks                                   | Salty snacks / Potatoes chips, pretzels, cheese snacks, puffed snacks, corn based chips                                                        |
| Beverages | Juice, nectars and flavored juice drinks | Flavored and sweetened beverages with juice or artificial flavored joice / Flavored juice, nectars                                             |
|           | Carbonated drinks                        | Carbonated beverages / Sodas, sparkling flavored waters                                                                                        |
|           | Sports drinks                            | Rehydrating drinks / Sport drinks                                                                                                              |
|           | Teas                                     | Tea based beverage / Ready to drink tea                                                                                                        |
|           | Milk, dairy drinks                       | Flavored milk drinks / Drinkable yogurt, chocolate milk, flavored milk                                                                         |
|           | Powdered milk flavors                    | Soluble dairy powders / Milk prepared with flavored powder                                                                                     |

**Table S2.** Terms used for the identification of non-nutritive sweeteners and polyols

|                                                       |                                                                                                                                                                                                                                                                                                                                                                                                                                                                                                                                                                                                                                                                                                                                                                                                                                                                                                                                                                                                                                                                                                                                                                                                                                                                                                                                                                                                                                                                                                                                                                                                                                                                                                                                                                                                                                                                                                                                                                                                                                                                                                                                                                                                                                                                                                                                                                                                                                                                                                                                                                                                                                                                                      |
|-------------------------------------------------------|--------------------------------------------------------------------------------------------------------------------------------------------------------------------------------------------------------------------------------------------------------------------------------------------------------------------------------------------------------------------------------------------------------------------------------------------------------------------------------------------------------------------------------------------------------------------------------------------------------------------------------------------------------------------------------------------------------------------------------------------------------------------------------------------------------------------------------------------------------------------------------------------------------------------------------------------------------------------------------------------------------------------------------------------------------------------------------------------------------------------------------------------------------------------------------------------------------------------------------------------------------------------------------------------------------------------------------------------------------------------------------------------------------------------------------------------------------------------------------------------------------------------------------------------------------------------------------------------------------------------------------------------------------------------------------------------------------------------------------------------------------------------------------------------------------------------------------------------------------------------------------------------------------------------------------------------------------------------------------------------------------------------------------------------------------------------------------------------------------------------------------------------------------------------------------------------------------------------------------------------------------------------------------------------------------------------------------------------------------------------------------------------------------------------------------------------------------------------------------------------------------------------------------------------------------------------------------------------------------------------------------------------------------------------------------------|
| <b>Terms<br/>(in<br/>English<br/>and<br/>Spanish)</b> | Acesulfame potassium, acesulfame de potasio, acesulfame k, acesulfame potasico, acesulfamo k, acesulfamo de potasio, acido cordicepico, acido ciclamico, ciclamic acid, adonitol, advantamo, advantame, aspartil fenilalanina metil ester, alitame, almindro hidrolizado hidrogenado, arabitol, aspartame, aspartamo, ciclamato de calcio, calcium cyclamate, ciclamato de sodio, sodium cyclamate, cordycepic acid, d-glucitol, d-glucitol syrup, d-maltitol, d-mannitol, d-sorbitol, edulcorante, edulcorantes, edulcorantes artificiales, endulzante, eritritol, erythritol, eritrite, estevia, extracto puro de Stevia, extracto puro de stevia rebaudiana, fructosa y stevia, fucitol, glucósidos de esteviol, extracto seco de estevia, estevioglicósidos, rebaudiosido, steviol glycosides, rebaudiosido a, galactitol, glicerol, glucitol, glucosido de steviol e 960, glycerin, glicerina, glycerine, granulado de Stevia, hydrogenated glucose syrup, hydrogenated isomaltulose, hydrogenated maltitol, hydrogenated starch hydrolysates, hydrogenated starch hydrolysate, hydrogenated starchhydrolysates, hydrogenatedstarch hydrolysates, iditol, inositol, isomalt, isomalt (e 953), isomalta, isomaltitol, isomaltol, isomaltulosa hidrogenada, jarabe de d-glucitol, jarabe de glucosa hidrogenada, jarabe de maltitol, jarabe de glucosa hidrogenado de alto contenido de maltosa, jarabe de glucosa hidrogenada, hidrolizado de almidón hidrogenado, poliglucitol, jarabe de poliglicitol, jarabe de sorbitol, jarabe de sorbitol ins420ii, lactitol, lactit, lactitolum, lactobiosit, lactobiositol, lactobiosiy, lactositol, maltotetraitol, maltitol, maltitol syrup, maltotritol, maltosa hidrogenada, mannitol, mannite, mannitol, d-manitol, meso-erythritol, meso eritritol, meso inositol, mezcla endulzante, modified polydextrose, neotame, neotamo, polyalcohol, polidextrosa a, polidextrosa n, polidextrosas, polidextrosas modificadas, polydextrose a, polydextrose n, poliglicitol, poliglucitol, polyglycitol, polyglycitol syrup, propilenglicol, propylene glycol, ibitol, sacarina, sacarina sodica, saccharin, sacarina de calcio, calcium saccharin, sacarina de potasio, potassium saccharin, sacarina de sodio, sodium saccharin, sal de aspartamo y acesulfamo, aspartamo-acesulfamo, aspartame-acesulfame salt, sales de calcio de leche y edulcorantes, sorbitol, sorbitol syrup, sorbitol liquid, sorbitol e 420, sorbit, 4,1,6-triclorogalactosacarosa, sorbol, Splenda, stevia, steviol glicosido, sucralosa, sucralose, tetrahidroxibutano, taumatina, thaumatin, threitol, volemitol, xylite, xylitol, xilitol, xilitol cristaline |
| <b>Codes</b>                                          | E 420, E 421, E 953, E 953, E 964, E 965, E 966, E 967 ,E 968, E-420, E-421, E-953, E-953, E-964 , E-965, E-966, E-967, E-968, E420, E421, E953, E953, E964, E965 , E966, E967, E-950, E-969, E-952, E-956, E-951, E-961, E-954, E-962, E-955, E-957, E-960, E 950, E 969, E 952, E 956, E 951, E 961, E 954, E 962, E 955, E 957, E 960, E950, E969, E952, E956, E951, E961, E954, E962, E955, E957, E960, SIN-950, SIN-969, SIN-952, SIN-956, SIN-951, SIN-961, SIN-954, SIN-962, SIN-955, SIN-957, SIN-960, SIN 950, SIN 969, SIN 952, SIN 956, SIN 951, SIN 961, SIN 954, SIN 962, SIN 955, SIN 957, SIN 960, SIN950, SIN969, SIN952, SIN956, SIN951, SIN961, SIN954, SIN962, SIN955, SIN957, SIN960, SIN 420, SIN 421, SIN 953, SIN 953, SIN 964, SIN 965, SIN 966, SIN 967, SIN 968, SIN-420, SIN-421, SIN-953, SIN-953, SIN-964, SIN-965, SIN-966, SIN-967, SIN-968, SIN420, SIN421, SIN953, SIN953, SIN964, SIN965, SIN966, SIN967, SIN968.                                                                                                                                                                                                                                                                                                                                                                                                                                                                                                                                                                                                                                                                                                                                                                                                                                                                                                                                                                                                                                                                                                                                                                                                                                                                                                                                                                                                                                                                                                                                                                                                                                                                                                                                  |

**Table S3.** Number of products declaring nutrients of concern in the three collections

| Category                                 | Total (n) | Sugar<br>n (%)  | Saturated fat<br>n (%) | Trans Fats<br>n (%) | Sodium<br>n (%) |
|------------------------------------------|-----------|-----------------|------------------------|---------------------|-----------------|
| <b>Beverages</b>                         | <b>29</b> | <b>29 (100)</b> | <b>13 (45)</b>         | <b>10 (34)</b>      | <b>29 (100)</b> |
| Juice, nectars and flavored juice drinks | 7         | 7 (100)         | 1 (14)                 | 1 (14)              | 7 (100)         |
| Carbonated drinks                        | 8         | 8 (100)         | 2 (25)                 | 0 (0)               | 8 (100)         |
| Sports drinks                            | 3         | 3 (100)         | 1 (33)                 | 0 (0)               | 3 (100)         |
| Teas                                     | 2         | 2 (100)         | 0 (0)                  | 0 (0)               | 2 (100)         |
| Milk and Dairy drinks                    | 6         | 6 (100)         | 6 (100)                | 6 (100)             | 6 (100)         |
| Powdered milk flavors                    | 3         | 3 (100)         | 3 (100)                | 3 (100)             | 3 (100)         |
| <b>Foods</b>                             | <b>65</b> | <b>64 (98)</b>  | <b>62 (95)</b>         | <b>62 (95)</b>      | <b>65 (100)</b> |
| Bread and Bakery Products                | 17        | 17 (100)        | 17 (100)               | 17 (100)            | 17 (100)        |
| Cereals                                  | 6         | 6 (100)         | 6 (100)                | 6 (100)             | 6 (100)         |
| Candies and Desserts                     | 8         | 8 (100)         | 5 (63)                 | 5 (63)              | 8 (100)         |
| Prepared, Ready to Eat Meals             | 5         | 4 (80)          | 5 (100)                | 5 (100)             | 5 (100)         |
| Meat and Eggs                            | 1         | 1 (100)         | 1 (100)                | 1 (100)             | 1 (100)         |
| Ice cream                                | 4         | 4 (100)         | 4 (100)                | 4 (100)             | 4 (100)         |
| Dairy Based products                     | 4         | 4 (100)         | 4 (100)                | 4 (100)             | 4 (100)         |
| Sauces, Spreads and Oils                 | 11        | 11 (100)        | 11 (100)               | 11 (100)            | 11 (100)        |
| Snacks                                   | 9         | 9 (100)         | 9 (100)                | 9 (100)             | 9 (100)         |
